# Supplementary material for: A potential prognostic long non-coding RNA signature to predict metastasis-free survival of breast cancer patients
Source: PubMed Central journal article supplement (PMC4637883; doi:10.1038/srep16553), 2015-11-09
Supplement: srep16553-s1.pdf [file srep16553-s1.pdf]

# **A potential prognostic long non-coding RNA signature to predict metastasis-free survival of breast cancer patients**

Jie Sun<sup>1, §</sup>, Xihai Chen<sup>2, §</sup>, Zhenzhen Wang<sup>1, §</sup>, Maoni Guo<sup>1</sup>, Hongbo Shi<sup>1</sup>,  
Xiaojun Wang<sup>1</sup>, Liang Cheng<sup>1</sup>, Meng Zhou<sup>1, \*</sup>

<sup>1</sup>College of Bioinformatics Science and Technology, Harbin Medical University,  
Harbin 150081, PR China

<sup>2</sup>Department of General Surgery, The Fourth Affiliated Hospital, Harbin medical  
university, Harbin 150081, China

\*Corresponding author

Meng Zhou, biofomeng@hotmail.com

College of Bioinformatics Science and Technology, Harbin Medical University,  
Harbin 150081, PR China

§These authors contributed equally to this work

**Supplementary Table S1.** Functional enrichment analysis of GO and KEGG pathway for mRNA positively correlated with prognostic lncRNAs

| Function category | Function term                                             | P value  | Fold Enrichment |
|-------------------|-----------------------------------------------------------|----------|-----------------|
| hsa04110:         | Cell cycle                                                | 5.08E-03 | 3.33            |
| hsa04114:         | Oocyte meiosis                                            | 3.00E-02 | 2.94            |
| hsa04115:         | p53 signaling pathway                                     | 4.72E-02 | 3.4             |
| GO:0031571        | G1 DNA damage checkpoint                                  | 1.61E-02 | 15              |
| GO:0005979        | regulation of glycogen biosynthetic process               | 2.58E-02 | 11.78           |
| GO:0032885        | regulation of polysaccharide biosynthetic process         | 2.58E-02 | 11.78           |
| GO:0010962        | regulation of glucan biosynthetic process                 | 2.58E-02 | 11.78           |
| GO:0032881        | regulation of polysaccharide metabolic process            | 2.94E-02 | 11              |
| GO:0021545        | cranial nerve development                                 | 4.56E-02 | 8.68            |
| GO:0051184        | cofactor transporter activity                             | 2.14E-02 | 12.97           |
| GO:0004033        | aldo-keto reductase activity                              | 2.82E-02 | 11.24           |
| GO:0031575        | G1/S transition checkpoint                                | 3.31E-03 | 12.94           |
| GO:0014032        | neural crest cell development                             | 2.15E-02 | 6.67            |
| GO:0014033        | neural crest cell differentiation                         | 2.15E-02 | 6.67            |
| GO:0009062        | fatty acid catabolic process                              | 2.70E-02 | 6.11            |
| GO:0007051        | spindle organization                                      | 4.77E-02 | 4.89            |
| GO:0007093        | mitotic cell cycle checkpoint                             | 7.45E-03 | 6.39            |
| GO:0000077        | DNA damage checkpoint                                     | 1.09E-02 | 5.73            |
| GO:0031570        | DNA integrity checkpoint                                  | 1.44E-02 | 5.29            |
| GO:0031329        | regulation of cellular catabolic process                  | 2.45E-02 | 4.51            |
| GO:0009063        | cellular amino acid catabolic process                     | 3.47E-02 | 4.04            |
| GO:0006986        | response to unfolded protein                              | 3.97E-02 | 3.87            |
| GO:0042770        | DNA damage response, signal transduction                  | 1.50E-02 | 4.12            |
| GO:0009894        | regulation of catabolic process                           | 3.02E-02 | 3.44            |
| GO:0051789        | response to protein stimulus                              | 4.49E-02 | 3.08            |
| GO:0001655        | urogenital system development                             | 4.96E-02 | 3               |
| GO:0000075        | cell cycle checkpoint                                     | 1.30E-03 | 4.83            |
| GO:0040007        | growth                                                    | 4.90E-02 | 2.4             |
| GO:0003774        | motor activity                                            | 1.32E-02 | 3.17            |
| GO:0046395        | carboxylic acid catabolic process                         | 9.17E-04 | 4.46            |
| GO:0016054        | organic acid catabolic process                            | 9.17E-04 | 4.46            |
| GO:0032269        | negative regulation of cellular protein metabolic process | 1.69E-02 | 2.75            |
| GO:0051248        | negative regulation of protein metabolic process          | 2.06E-02 | 2.65            |
| GO:0006605        | protein targeting                                         | 4.20E-02 | 2.3             |
| GO:0050662        | coenzyme binding                                          | 1.54E-02 | 2.79            |
| GO:0003924        | GTPase activity                                           | 3.46E-02 | 2.4             |
| GO:0009055        | electron carrier activity                                 | 4.35E-02 | 2.29            |
| GO:0000226        | microtubule cytoskeleton organization                     | 1.43E-03 | 3.74            |
| GO:0003006        | reproductive developmental process                        | 4.93E-02 | 2.1             |
| GO:0003735        | structural constituent of ribosome                        | 3.06E-03 | 3.35            |
| GO:0006414        | translational elongation                                  | 1.43E-05 | 5.99            |

---

|            |                               |          |      |
|------------|-------------------------------|----------|------|
| GO:0051301 | cell division                 | 1.89E-02 | 2.24 |
| GO:0000280 | nuclear division              | 6.78E-04 | 3.25 |
| GO:0007067 | mitosis                       | 6.78E-04 | 3.25 |
| GO:0048285 | organelle fission             | 9.63E-04 | 3.12 |
| GO:0000087 | M phase of mitotic cell cycle | 2.24E-04 | 3.44 |
| GO:0007017 | microtubule-based process     | 7.19E-04 | 3.04 |
| GO:0051726 | regulation of cell cycle      | 7.45E-03 | 2.33 |
| GO:0000279 | M phase                       | 9.84E-04 | 2.67 |
| GO:0006412 | translation                   | 1.05E-03 | 2.66 |
| GO:0000278 | mitotic cell cycle            | 4.20E-04 | 2.68 |
| GO:0022403 | cell cycle phase              | 1.95E-04 | 2.66 |
| GO:0022402 | cell cycle process            | 2.47E-04 | 2.34 |
| GO:0007049 | cell cycle                    | 1.66E-04 | 2.13 |

---

**Supplementary Table S2.** Clinical and pathological characteristics of patients with breast cancer in our study.

| Characteristics    |          | Training<br>dataset<br>n=254 | Testing<br>dataset<br>n=254 | GSE25066<br>dataset<br>n=508 | GSE4922<br>dataset<br>n=289 | GSE1456<br>dataset<br>n=159 |
|--------------------|----------|------------------------------|-----------------------------|------------------------------|-----------------------------|-----------------------------|
| Age, no (%)        | (0, 40]  | 46 (18%)                     | 51 (20%)                    | 97 (19%)                     | 19 (7%)                     |                             |
|                    | (40, 50] | 103 (40%)                    | 77 (30%)                    | 180 (35%)                    | 35 (12%)                    |                             |
|                    | (50, 60] | 58 (23%)                     | 77 (30%)                    | 135 (27%)                    | 52 (18%)                    |                             |
|                    | (60, 70] | 37 (15%)                     | 44 (17%)                    | 81 (16%)                     | 65 (22%)                    |                             |
|                    | (70, 99) | 10 (4%)                      | 5 (2%)                      | 15 (3%)                      | 78 (27%)                    |                             |
|                    | NA       |                              |                             |                              | 40 (14%)                    |                             |
| ER, no (%)         | P        | 140 (55%)                    | 157 (62%)                   | 297 (58%)                    | 211 (73%)                   |                             |
|                    | N        | 110 (43%)                    | 95 (37%)                    | 205 (40%)                    | 34 (12%)                    |                             |
|                    | I        | 2 (1%)                       | 2 (1%)                      | 4 (1%)                       | 0                           |                             |
|                    | NA       | 2 (1%)                       | 0                           | 2 (1%)                       | 44 (15%)                    |                             |
| ESR1, no (%)       | P        | 145 (57%)                    | 146 (57%)                   | 291 (57%)                    |                             |                             |
|                    | N        | 109 (43%)                    | 108 (43%)                   | 217 (43%)                    |                             |                             |
| ERBB2, no (%)      | P        | 14 (5%)                      | 16 (6%)                     | 29 (6%)                      |                             |                             |
|                    | N        | 241 (95%)                    | 238 (94%)                   | 479 (94%)                    |                             |                             |
| Tumor size, no (%) | (0, 3]   |                              |                             |                              | 211 (73%)                   |                             |
|                    | (3, 5]   |                              |                             |                              | 32 (11%)                    |                             |
|                    | (5, 13]  |                              |                             |                              | 6 (2%)                      |                             |
|                    | NA       |                              |                             |                              | 40 (14%)                    |                             |
| Metastasis event   | Yes(1)   | 62 (24%)                     | 49 (19%)                    | 111 (22%)                    | 89 (31%)                    | 40 (25%)                    |
|                    | NO(0)    | 192 (76%)                    | 205 (81%)                   | 397 (78%)                    | 160 (55%)                   | 119 (75%)                   |
|                    | NA       | 0                            | 0                           | 0                            | 40 (14%)                    |                             |

**Supplementary Table S3. The detailed information of probe sets and their corresponding lncRNAs in the Affymetrix HG-U133A platform used in our study**

| lncRNA ID          | Probe                                           |
|--------------------|-------------------------------------------------|
| ENSG00000093100.13 | 212715_s_at                                     |
| ENSG00000116652.6  | 215629_s_at                                     |
| ENSG00000126005.13 | 213171_s_at                                     |
| ENSG00000130600.13 | 217723_x_at                                     |
| ENSG00000152931.7  | "205834_s_at,215972_at"                         |
| ENSG00000157306.12 | "207699_at,214341_at,218540_at"                 |
| ENSG00000173867.8  | 215919_s_at                                     |
| ENSG00000175147.9  | 213752_at                                       |
| ENSG00000176868.2  | 212069_s_at                                     |
| ENSG00000177133.8  | 207890_s_at                                     |
| ENSG00000177699.4  | 215688_at                                       |
| ENSG00000182109.5  | 220204_s_at                                     |
| ENSG00000182873.5  | 220846_s_at                                     |
| ENSG00000183562.3  | 220514_at                                       |
| ENSG00000186056.7  | 215053_at                                       |
| ENSG00000187621.12 | 219840_s_at                                     |
| ENSG00000189223.11 | "209552_at,213917_at"                           |
| ENSG00000197670.5  | 215861_at                                       |
| ENSG00000203325.3  | 214185_at                                       |
| ENSG00000203386.4  | "208725_at,209297_at,209298_s_at,216628_at"     |
| ENSG00000203605.3  | 206250_x_at                                     |
| ENSG00000203876.7  | 222072_at                                       |
| ENSG00000204929.9  | 217012_at                                       |
| ENSG00000204971.3  | 204437_s_at                                     |
| ENSG00000205054.4  | "207999_s_at,209578_s_at,212421_at,217118_s_at" |
| ENSG00000205861.9  | 222277_at                                       |
| ENSG00000211683.3  | 221108_at                                       |
| ENSG00000213904.6  | "206576_s_at,206676_at,209498_at"               |
| ENSG00000214184.3  | 202832_at                                       |
| ENSG00000215866.5  | 213739_at                                       |
| ENSG00000215908.6  | 221988_at                                       |
| ENSG00000221819.4  | 207615_s_at                                     |
| ENSG00000223442.1  | 209349_at                                       |
| ENSG00000223479.3  | 214276_at                                       |
| ENSG00000223563.1  | 219935_at                                       |
| ENSG00000223647.1  | 210052_s_at                                     |
| ENSG00000223653.3  | "206837_at,209094_at"                           |
| ENSG00000223745.5  | 201798_s_at                                     |
| ENSG00000223774.3  | 211562_s_at                                     |
| ENSG00000223797.3  | 206191_at                                       |
| ENSG00000223799.1  | 204786_s_at                                     |

ENSG00000223814.1 220574\_at  
ENSG00000223907.1 212758\_s\_at  
ENSG00000223910.1 209538\_at  
ENSG00000223947.1 "205459\_s\_at,213462\_at,39549\_at"  
ENSG00000223949.4 "201716\_at,213364\_s\_at,216357\_at"  
ENSG00000224063.3 "213258\_at,214378\_at"  
ENSG00000224066.1 219585\_at  
ENSG00000224078.10 "211575\_s\_at,213128\_s\_at,213291\_s\_at,221001\_at,221974\_at"  
ENSG00000224081.5 "208468\_at,215103\_at,216739\_at"  
ENSG00000224127.1 212352\_s\_at  
ENSG00000224149.1 212352\_s\_at  
ENSG00000224184.3 216422\_at  
ENSG00000224209.4 219210\_s\_at  
ENSG00000224445.2 219018\_s\_at  
ENSG00000224459.1 208520\_at  
ENSG00000224505.2 202815\_s\_at  
ENSG00000224597.7 202565\_s\_at  
ENSG00000224613.4 212424\_at  
ENSG00000224645.1 202963\_at  
ENSG00000224660.1 201811\_x\_at  
ENSG00000224854.3 220505\_at  
ENSG00000224875.2 212931\_at  
ENSG00000225057.2 205251\_at  
ENSG00000225087.1 "203620\_s\_at,208033\_s\_at,214194\_at,220980\_s\_at"  
ENSG00000225206.5 "211953\_s\_at,211954\_s\_at"  
ENSG00000225313.3 "216811\_at,216812\_at"  
ENSG00000225330.1 206947\_at  
ENSG00000225420.1 218696\_at  
ENSG00000225465.7 207934\_at  
ENSG00000225506.2 "203257\_s\_at,217319\_x\_at,217879\_at,217880\_at"  
ENSG00000225623.1 "200659\_s\_at,207347\_at"  
ENSG00000225632.1 "221919\_at,222040\_at"  
ENSG00000225667.1 218824\_at  
ENSG00000225670.3 "208335\_s\_at,216535\_at,217442\_at"  
ENSG00000225721.3 209408\_at  
ENSG00000225733.3 217300\_at  
ENSG00000225762.1 204816\_s\_at  
ENSG00000225889.5 210341\_at  
ENSG00000226067.4 219022\_at  
ENSG00000226143.1 213837\_at  
ENSG00000226245.1 209538\_at  
ENSG00000226330.1 204484\_at  
ENSG00000226334.1 215876\_at  
ENSG00000226419.4 "217570\_x\_at,220354\_at"

ENSG00000226664.1 214324\_at  
ENSG00000226752.5 215546\_at  
ENSG00000226785.1 "208370\_s\_at,215253\_s\_at,217337\_at"  
ENSG00000226835.1 218889\_at  
ENSG00000226883.1 "202345\_s\_at,207057\_at"  
ENSG00000226925.1 215561\_s\_at  
ENSG00000226994.5 "201415\_at,210365\_at,215795\_at"  
ENSG00000227028.4 "207053\_at,217092\_x\_at"  
ENSG00000227082.1 219035\_s\_at  
ENSG00000227110.4 218574\_s\_at  
ENSG00000227117.4 202197\_at  
ENSG00000227161.1 209308\_s\_at  
ENSG00000227210.1 "206091\_at,209684\_at"  
ENSG00000227218.5 209391\_at  
ENSG00000227227.1 202351\_at  
ENSG00000227258.3 "220930\_s\_at,220931\_at"  
ENSG00000227292.1 202027\_at  
ENSG00000227372.8 213340\_s\_at  
ENSG00000227415.1 220090\_at  
ENSG00000227589.1 209154\_at  
ENSG00000227617.6 212446\_s\_at  
ENSG00000227907.1 205929\_at  
ENSG00000227947.1 202738\_s\_at  
ENSG00000227963.1 200071\_at  
ENSG00000228035.1 206814\_at  
ENSG00000228192.5 209852\_x\_at  
ENSG00000228237.3 201778\_s\_at  
ENSG00000228242.4 209375\_at  
ENSG00000228274.3 203450\_at  
ENSG00000228363.2 202636\_at  
ENSG00000228389.1 216110\_x\_at  
ENSG00000228395.1 206921\_at  
ENSG00000228420.1 209045\_at  
ENSG00000228436.2 "203359\_s\_at,220605\_s\_at"  
ENSG00000228463.6 "206107\_at,206889\_at,212504\_at,215698\_at"  
ENSG00000228504.1 218087\_s\_at  
ENSG00000228509.3 209272\_at  
ENSG00000228613.1 217240\_at  
ENSG00000228620.1 208359\_s\_at  
ENSG00000228623.3 207068\_at  
ENSG00000228737.2 216326\_s\_at  
ENSG00000228784.5 210803\_at  
ENSG00000228794.6 219136\_s\_at  
ENSG00000228839.3 209431\_s\_at

ENSG00000228843.2 203169\_at  
ENSG00000228853.1 "208385\_at,219027\_s\_at"  
ENSG00000228925.1 212245\_at  
ENSG00000228971.2 "204557\_s\_at,209995\_s\_at,212123\_at,219840\_s\_at"  
ENSG00000229160.1 216183\_at  
ENSG00000229407.3 209353\_s\_at  
ENSG00000229414.2 204487\_s\_at  
ENSG00000229431.1 201376\_s\_at  
ENSG00000229444.1 214392\_at  
ENSG00000229582.3 220752\_at  
ENSG00000229621.1 "206064\_s\_at,209299\_x\_at"  
ENSG00000229846.1  
    "201221\_s\_at,209118\_s\_at,211058\_x\_at,211072\_x\_at,213646\_x\_at,220036\_s\_at,220774\_at"  
ENSG00000229953.1 221623\_at  
ENSG00000229956.7 "205472\_s\_at,213934\_s\_at"  
ENSG00000230021.5 "202932\_at,204142\_at,207592\_s\_at,213645\_at,214019\_at,217684\_at,217690\_at"  
ENSG00000230023.2 218571\_s\_at  
ENSG00000230027.1 "208753\_s\_at,208754\_s\_at"  
ENSG00000230084.3 202380\_s\_at  
ENSG00000230148.6 208414\_s\_at  
ENSG00000230185.4 209512\_at  
ENSG00000230223.4 216391\_s\_at  
ENSG00000230250.1 208521\_at  
ENSG00000230424.1 215991\_s\_at  
ENSG00000230448.3 "202557\_at,202558\_s\_at,219250\_s\_at"  
ENSG00000230479.1 210689\_at  
ENSG00000230551.4 "208865\_at,213860\_x\_at"  
ENSG00000230615.4 "206175\_x\_at,207128\_s\_at,221759\_at"  
ENSG00000230735.1 205913\_at  
ENSG00000230798.3 214164\_x\_at  
ENSG00000230817.3 "201759\_at,209524\_at,209525\_at,215055\_at,216128\_at,216693\_x\_at"  
ENSG00000230864.1 204475\_at  
ENSG00000230876.4 "201147\_s\_at,201150\_s\_at"  
ENSG00000231090.1 212386\_at  
ENSG00000231128.3 "1598\_g\_at,205115\_s\_at"  
ENSG00000231163.3 220568\_at  
ENSG00000231204.3 212965\_at  
ENSG00000231252.1 204566\_at  
ENSG00000231294.1 206069\_s\_at  
ENSG00000231312.4 "200779\_at,204593\_s\_at,204594\_s\_at,206947\_at,221516\_s\_at"  
ENSG00000231365.3 207593\_at  
ENSG00000231367.3 "204017\_at,207264\_at,208359\_s\_at,208718\_at,208719\_s\_at"  
ENSG00000231429.2 219035\_s\_at  
ENSG00000231532.3 216342\_x\_at



ENSG00000231563.1 220279\_at  
ENSG00000231607.6 "203659\_s\_at,205677\_s\_at"  
ENSG00000231609.3 212653\_s\_at  
ENSG00000231671.1 211262\_at  
ENSG00000231816.1 "202345\_s\_at,207057\_at"  
ENSG00000231826.3 216004\_s\_at  
ENSG00000231918.1 "212062\_at,219536\_s\_at"  
ENSG00000231949.1 "219781\_s\_at,221968\_s\_at"  
ENSG00000231964.1 204446\_s\_at  
ENSG00000231987.1 "209120\_at,219164\_s\_at,221773\_at"  
ENSG00000231992.1 212570\_at  
ENSG00000231993.1 213579\_s\_at  
ENSG00000231999.4 "212930\_at,212978\_at,215716\_s\_at,219707\_at"  
ENSG00000232021.4 221557\_s\_at  
ENSG00000232284.5  
"201088\_at,203785\_s\_at,204428\_s\_at,210555\_s\_at,210556\_at,211004\_s\_at,211112\_at,212910\_at,213141\_a  
t,215506\_s\_at,216476\_at,218878\_s\_at,221111\_at"  
ENSG00000232298.2 "216388\_s\_at,220130\_x\_at"  
ENSG00000232377.1 219770\_at  
ENSG00000232451.1 "202877\_s\_at,203887\_s\_at,203888\_at"  
ENSG00000232633.4 211694\_at  
ENSG00000232656.5 208881\_x\_at  
ENSG00000232725.1 205142\_x\_at  
ENSG00000232748.3 219047\_s\_at  
ENSG00000232754.1 213579\_s\_at  
ENSG00000232767.1 214434\_at  
ENSG00000232811.1 220235\_s\_at  
ENSG00000232825.1 "212730\_at,214304\_x\_at"  
ENSG00000232828.1 218619\_s\_at  
ENSG00000232878.1 212738\_at  
ENSG00000232973.9 "216183\_at,221178\_at"  
ENSG00000233005.1 "200676\_s\_at,200684\_s\_at,206064\_s\_at,209299\_x\_at,212271\_at,212965\_at"  
ENSG00000233070.1 "207246\_at,207247\_s\_at"  
ENSG00000233101.8 208414\_s\_at  
ENSG00000233147.1 204574\_s\_at  
ENSG00000233184.4 "217226\_s\_at,219441\_s\_at,220974\_x\_at"  
ENSG00000233246.1 210148\_at  
ENSG00000233290.1 "202856\_s\_at,208774\_at,217685\_at"  
ENSG00000233359.1 "201439\_at,202076\_at,216858\_x\_at,219086\_at"  
ENSG00000233360.4 213633\_at  
ENSG00000233399.2 210157\_at  
ENSG00000233427.1 "209322\_s\_at,40149\_at"  
ENSG00000233589.1 214140\_at  
ENSG00000233695.2 1598\_g\_at

ENSG00000233706.1 213595\_s\_at  
ENSG00000233718.3 216188\_at  
ENSG00000233723.5 "202549\_at,208601\_s\_at,217851\_s\_at,221500\_s\_at"  
ENSG00000233755.1 "220879\_at,221001\_at"  
ENSG00000233818.1 210689\_at  
ENSG00000233828.3 "215187\_at,220828\_s\_at"  
ENSG00000233864.5 214983\_at  
ENSG00000233891.5 208399\_s\_at  
ENSG00000233896.1 206803\_at  
ENSG00000233912.1 217852\_s\_at  
ENSG00000233937.4 221897\_at  
ENSG00000233973.3 220628\_s\_at  
ENSG00000234132.2 217515\_s\_at  
ENSG00000234184.3 "202986\_at,216820\_at"  
ENSG00000234264.1 200605\_s\_at  
ENSG00000234378.1 219811\_at  
ENSG00000234423.1 204598\_at  
ENSG00000234425.1 211191\_at  
ENSG00000234494.5 211736\_at  
ENSG00000234497.3 "218564\_at,218964\_at"  
ENSG00000234608.5 64432\_at  
ENSG00000234617.1 209481\_at  
ENSG00000234684.4 "200709\_at,210187\_at"  
ENSG00000234690.4 "207130\_at,209049\_s\_at"  
ENSG00000234807.5 "213429\_at,217828\_at"  
ENSG00000234810.1 "207006\_s\_at,215715\_at,216331\_at,217694\_at,218381\_s\_at,219230\_at"  
ENSG00000234899.7 202935\_s\_at  
ENSG00000234936.1 217346\_at  
ENSG00000234953.2 217796\_s\_at  
ENSG00000235016.1 201395\_at  
ENSG00000235106.6 "203245\_s\_at,203825\_at,212547\_at,213788\_s\_at"  
ENSG00000235280.2 220354\_at  
ENSG00000235335.2 220829\_s\_at  
ENSG00000235358.1 211369\_at  
ENSG00000235373.1 218898\_at  
ENSG00000235423.6 201938\_at  
ENSG00000235426.2 212423\_at  
ENSG00000235437.5 216838\_at  
ENSG00000235531.7 217590\_s\_at  
ENSG00000235665.3 "201580\_s\_at,216027\_at"  
ENSG00000235725.1 217012\_at  
ENSG00000235848.2 209843\_s\_at  
ENSG00000235872.2 202971\_s\_at  
ENSG00000235910.1 "204156\_at,213034\_at"

ENSG00000235939.1 207347\_at  
ENSG00000235954.4 215146\_s\_at  
ENSG00000235958.3 "204598\_at,219016\_at"  
ENSG00000235978.4 216944\_s\_at  
ENSG00000236064.1 209733\_at  
ENSG00000236065.2 215480\_at  
ENSG00000236200.3 203205\_at  
ENSG00000236204.3 "204383\_at,210010\_s\_at,215003\_at,216145\_at,216285\_at,217275\_at,217285\_at"  
ENSG00000236213.1 "209286\_at,209287\_s\_at,209288\_s\_at,210454\_s\_at"  
ENSG00000236266.1 222088\_s\_at  
ENSG00000236283.1 210432\_s\_at  
ENSG00000236449.1 "202663\_at,211940\_x\_at,213826\_s\_at,213828\_x\_at"  
ENSG00000236782.3 202533\_s\_at  
ENSG00000236790.3 216027\_at  
ENSG00000236810.3 213604\_at  
ENSG00000236856.1 218145\_at  
ENSG00000236869.1 206314\_at  
ENSG00000236886.2 "203424\_s\_at,217424\_at,217439\_at"  
ENSG00000236901.4 221422\_s\_at  
ENSG00000236915.1 216572\_at  
ENSG00000236948.1 210705\_s\_at  
ENSG00000236963.3 209448\_at  
ENSG00000237094.9 "216798\_at,219664\_s\_at,221005\_s\_at"  
ENSG00000237188.3 "205776\_at,215300\_s\_at"  
ENSG00000237250.3 215970\_at  
ENSG00000237298.6 208195\_at  
ENSG00000237301.1 "202386\_s\_at,208121\_s\_at,212736\_at"  
ENSG00000237413.3 206360\_s\_at  
ENSG00000237416.4 216058\_s\_at  
ENSG00000237435.6 206643\_at  
ENSG00000237491.6 "208954\_s\_at,218725\_at,218993\_at,220806\_x\_at"  
ENSG00000237505.4 213063\_at  
ENSG00000237517.6 215003\_at  
ENSG00000237667.3 216505\_x\_at  
ENSG00000237781.3 220578\_at  
ENSG00000237836.3 209439\_s\_at  
ENSG00000237844.1 "216463\_at,216618\_at"  
ENSG00000237938.3 "208543\_at,218414\_s\_at"  
ENSG00000237954.5 207436\_x\_at  
ENSG00000238045.7 218300\_at  
ENSG00000238186.1 219567\_s\_at  
ENSG00000238242.1 219972\_s\_at  
ENSG00000238290.1 "203734\_at,209300\_s\_at,209602\_s\_at,209603\_at,210737\_at"  
ENSG00000240291.1 "207776\_s\_at,213714\_at"

ENSG00000240553.1 "201715\_s\_at,221832\_s\_at"  
ENSG00000240618.1 "209092\_s\_at,212925\_at"  
ENSG00000240666.1 203434\_s\_at  
ENSG00000241014.1 220608\_s\_at  
ENSG00000241728.3 "203995\_at,203996\_s\_at,214309\_s\_at"  
ENSG00000242349.3 203950\_s\_at  
ENSG00000242540.2 "204913\_s\_at,204914\_s\_at,204915\_s\_at"  
ENSG00000242553.1 203635\_at  
ENSG00000242808.5 214178\_s\_at  
ENSG00000243305.1 "201151\_s\_at,201152\_s\_at,201153\_s\_at"  
ENSG00000243415.2 220787\_at  
ENSG00000243960.1 201421\_s\_at  
ENSG00000244332.1 220085\_at  
ENSG00000244513.4 213024\_at  
ENSG00000244558.3 205792\_at  
ENSG00000245156.1 220964\_s\_at  
ENSG00000245275.5 "207357\_s\_at,212256\_at"  
ENSG00000245532.5 214657\_s\_at  
ENSG00000245832.4 208904\_s\_at  
ENSG00000245864.2 "209199\_s\_at,209200\_at"  
ENSG00000245928.2 203915\_at  
ENSG00000246250.2 217869\_at  
ENSG00000246263.2 208883\_at  
ENSG00000246316.5 220116\_at  
ENSG00000246334.2 "202848\_s\_at,210981\_s\_at"  
ENSG00000246366.4 218701\_at  
ENSG00000246477.3 204837\_at  
ENSG00000246777.1 217443\_at  
ENSG00000246859.2 "201310\_s\_at,222344\_at"  
ENSG00000246863.2 215981\_at  
ENSG00000246889.2 "202066\_at,210236\_at"  
ENSG00000247081.5 218899\_s\_at  
ENSG00000247137.6 220572\_at  
ENSG00000247993.2 206307\_s\_at  
ENSG00000248049.4 204013\_s\_at  
ENSG00000248138.3 206481\_s\_at  
ENSG00000248525.2 221324\_at  
ENSG00000249001.3 217067\_s\_at  
ENSG00000249249.1 214658\_at  
ENSG00000249502.1 217933\_s\_at  
ENSG00000249532.3 215246\_at  
ENSG00000249717.1 221183\_at  
ENSG00000249786.5 206073\_at  
ENSG00000249835.2 204620\_s\_at

ENSG00000250025.2 208554\_at  
ENSG00000250135.1 "212101\_at,212103\_at"  
ENSG00000250155.1 202800\_at  
ENSG00000250186.3 200659\_s\_at  
ENSG00000250608.1 219542\_at  
ENSG00000250619.1 213169\_at  
ENSG00000250646.1 203934\_at  
ENSG00000250733.5 208266\_at  
ENSG00000250906.1 213419\_at  
ENSG00000251003.5 219778\_at  
ENSG00000251018.2 207165\_at  
ENSG00000251095.4 204466\_s\_at  
ENSG00000251175.3 220063\_at  
ENSG00000251239.1 207869\_s\_at  
ENSG00000251314.2 205825\_at  
ENSG00000251448.1 222340\_at  
ENSG00000251556.1 217810\_x\_at  
ENSG00000251675.1 212812\_at  
ENSG00000253116.1 220898\_at  
ENSG00000253352.6 "212337\_at,212725\_s\_at"  
ENSG00000253535.3 211239\_s\_at  
ENSG00000253607.1 218172\_s\_at  
ENSG00000253629.1 211685\_s\_at  
ENSG00000253643.3 211239\_s\_at  
ENSG00000253736.1 "201041\_s\_at,201044\_x\_at"  
ENSG00000253875.1 218125\_s\_at  
ENSG00000253961.1 205667\_at  
ENSG00000254317.1 217916\_s\_at  
ENSG00000254418.1 "209437\_s\_at,213993\_at,213994\_s\_at"  
ENSG00000254429.1 221861\_at  
ENSG00000254452.1 220964\_s\_at  
ENSG00000254458.1 219025\_at  
ENSG00000254488.1 211614\_at  
ENSG00000254662.1 200957\_s\_at  
ENSG00000254664.1 220571\_at  
ENSG00000254671.2 216396\_s\_at  
ENSG00000254721.1 202535\_at  
ENSG00000254873.1 202038\_at  
ENSG00000254907.1 "201687\_s\_at,214960\_at"  
ENSG00000255052.4 222184\_at  
ENSG00000255125.1 200004\_at  
ENSG00000255224.1 91684\_g\_at  
ENSG00000255306.1 211004\_s\_at  
ENSG00000255384.1 211775\_x\_at

ENSG00000255390.1 218892\_at  
ENSG00000255435.4 "212076\_at,212080\_at"  
ENSG00000255467.1 203531\_at  
ENSG00000255580.1 220666\_at  
ENSG00000255644.1 205304\_s\_at  
ENSG00000255723.1 217989\_at  
ENSG00000255733.3 221111\_at  
ENSG00000255750.3 204963\_at  
ENSG00000255794.4 222325\_at  
ENSG00000255811.1 216579\_at  
ENSG00000255850.1 204807\_at  
ENSG00000255929.3 "209892\_at,209893\_s\_at"  
ENSG00000255968.1 202662\_s\_at  
ENSG00000256007.1 212516\_at  
ENSG00000256034.1 201045\_s\_at  
ENSG00000256196.1 201361\_at  
ENSG00000256234.1 204963\_at  
ENSG00000256751.3 206312\_at  
ENSG00000256947.1 202237\_at  
ENSG00000257000.1 "212375\_at,212376\_s\_at"  
ENSG00000257042.1 211756\_at  
ENSG00000257286.1 221777\_at  
ENSG00000257337.4 219599\_at  
ENSG00000257342.1 200714\_x\_at  
ENSG00000257379.1 217794\_at  
ENSG00000257453.1 218000\_s\_at  
ENSG00000257500.1 207065\_at  
ENSG00000257520.1 211024\_s\_at  
ENSG00000257545.2 219459\_at  
ENSG00000257621.5 220701\_at  
ENSG00000257653.1 209195\_s\_at  
ENSG00000257894.2 "203998\_s\_at,203999\_at"  
ENSG00000257913.2 201805\_at  
ENSG00000258017.1 "211058\_x\_at,211072\_x\_at,213646\_x\_at"  
ENSG00000258048.1 201603\_at  
ENSG00000258092.1 200895\_s\_at  
ENSG00000258199.1 201320\_at  
ENSG00000258232.2 211750\_x\_at  
ENSG00000258301.3 203940\_s\_at  
ENSG00000258302.2 "212930\_at,215716\_s\_at"  
ENSG00000258325.2 200895\_s\_at  
ENSG00000258344.1 "200016\_x\_at,221919\_at,222040\_at"  
ENSG00000258377.1 211061\_s\_at  
ENSG00000258378.1 218316\_at

ENSG00000258384.1 221708\_s\_at  
ENSG00000258407.1 214467\_at  
ENSG00000258428.3 219757\_s\_at  
ENSG00000258451.1 205141\_at  
ENSG00000258457.3 219009\_at  
ENSG00000258520.1 218363\_at  
ENSG00000258667.1 200989\_at  
ENSG00000258761.1 210542\_s\_at  
ENSG00000258782.3 "221137\_at,221138\_s\_at"  
ENSG00000258851.1 202984\_s\_at  
ENSG00000258871.1 "210270\_at,211448\_s\_at"  
ENSG00000258891.1 "202010\_s\_at,209944\_at"  
ENSG00000258908.1 201695\_s\_at  
ENSG00000258964.1 200989\_at  
ENSG00000259006.1 205458\_at  
ENSG00000259018.1 204400\_at  
ENSG00000259080.1 220321\_s\_at  
ENSG00000259084.4 219840\_s\_at  
ENSG00000259116.1 213376\_at  
ENSG00000259138.1 212352\_s\_at  
ENSG00000259172.1 207414\_s\_at  
ENSG00000259248.3 221654\_s\_at  
ENSG00000259291.2 "213657\_s\_at,37590\_g\_at,39891\_at"  
ENSG00000259327.1 204000\_at  
ENSG00000259357.2 222212\_s\_at  
ENSG00000259370.2 "212701\_at,212703\_at"  
ENSG00000259475.1 "203627\_at,214304\_x\_at"  
ENSG00000259627.1 210986\_s\_at  
ENSG00000259661.1 202032\_s\_at  
ENSG00000259673.3 220361\_at  
ENSG00000259678.1 212820\_at  
ENSG00000259735.1 215408\_at  
ENSG00000259736.1 218648\_at  
ENSG00000259755.1 219441\_s\_at  
ENSG00000259768.5 208033\_s\_at  
ENSG00000259849.1 216726\_at  
ENSG00000259954.1 "219971\_at,221658\_s\_at"  
ENSG00000259976.1 213158\_at  
ENSG00000259992.1 "209046\_s\_at,219384\_s\_at"  
ENSG00000260017.1 210057\_at  
ENSG00000260213.3 222118\_at  
ENSG00000260252.1 218794\_s\_at  
ENSG00000260269.3 207438\_s\_at  
ENSG00000260372.4 "210066\_s\_at,210067\_at"

ENSG00000260570.1 201806\_s\_at  
ENSG00000260616.4 "213295\_at,214272\_at,60084\_at"  
ENSG00000260619.1 216106\_at  
ENSG00000260661.1 210542\_s\_at  
ENSG00000260743.1 215825\_at  
ENSG00000260755.1 "204276\_at,204277\_s\_at"  
ENSG00000260803.1 217212\_s\_at  
ENSG00000260808.1 217928\_s\_at  
ENSG00000260853.1 217527\_s\_at  
ENSG00000260874.3 "204826\_at,204827\_s\_at"  
ENSG00000260886.1 206916\_x\_at  
ENSG00000260917.1 213739\_at  
ENSG00000260990.1 "206990\_at,213841\_at"  
ENSG00000261002.3 "212202\_s\_at,212204\_at"  
ENSG00000261012.2 218492\_s\_at  
ENSG00000261063.1 215301\_at  
ENSG00000261065.1 219268\_at  
ENSG00000261067.4 211005\_at  
ENSG00000261097.1 215738\_at  
ENSG00000261312.1 213235\_at  
ENSG00000261351.2 202670\_at  
ENSG00000261487.1 221864\_at  
ENSG00000261552.1 211005\_at  
ENSG00000261582.1 213171\_s\_at  
ENSG00000261771.3 221511\_x\_at  
ENSG00000261790.1 204660\_at  
ENSG00000262039.1 200659\_s\_at  
ENSG00000262075.3 216608\_at  
ENSG00000262160.1 207416\_s\_at  
ENSG00000262211.1 "204864\_s\_at,212195\_at"  
ENSG00000262668.1 "207338\_s\_at,217308\_at,221402\_at"  
ENSG00000262769.1 219525\_at  
ENSG00000262967.1 211717\_at  
ENSG00000263072.3 206416\_at  
ENSG00000263218.2 218743\_at  
ENSG00000263276.1 207416\_s\_at  
ENSG00000263293.2 216261\_at  
ENSG00000263300.1 219794\_at  
ENSG00000263585.1 202148\_s\_at  
ENSG00000263711.3 "216703\_at,216709\_at"  
ENSG00000263753.4 215283\_at  
ENSG00000264339.1 222180\_at  
ENSG00000264635.1 222180\_at  
ENSG00000264672.3 210348\_at



ENSG00000264860.1 "214597\_at,217455\_s\_at"  
ENSG00000265128.1 220774\_at  
ENSG00000265148.3 218704\_at  
ENSG00000265263.1 203463\_s\_at  
ENSG00000265408.1 "209667\_at,213509\_x\_at"  
ENSG00000265496.3 214291\_at  
ENSG00000265664.1 221585\_at  
ENSG00000265678.1 214818\_at  
ENSG00000265888.1 207324\_s\_at  
ENSG00000266101.1 210185\_at  
ENSG00000266120.1 202179\_at  
ENSG00000266283.1 210002\_at  
ENSG00000266368.1 207959\_s\_at  
ENSG00000266830.1 220654\_at  
ENSG00000266844.1 207323\_s\_at  
ENSG00000266903.1 212662\_at  
ENSG00000266929.1 215880\_at  
ENSG00000267009.4 213836\_s\_at  
ENSG00000267026.3 218885\_s\_at  
ENSG00000267048.1 220715\_at  
ENSG00000267104.2 221194\_s\_at  
ENSG00000267124.2 "221863\_at,44822\_s\_at"  
ENSG00000267165.1 218178\_s\_at  
ENSG00000267169.1 "203488\_at,219145\_at,47560\_at"  
ENSG00000267191.1 222028\_at  
ENSG00000267193.3 208409\_at  
ENSG00000267219.1 203288\_at  
ENSG00000267225.1 212880\_at  
ENSG00000267268.1 215758\_x\_at  
ENSG00000267278.3 205192\_at  
ENSG00000267280.3 213417\_at  
ENSG00000267379.1 202910\_s\_at  
ENSG00000267394.1 202692\_s\_at  
ENSG00000267458.1 212952\_at  
ENSG00000267476.1 208309\_s\_at  
ENSG00000267523.1 218381\_s\_at  
ENSG00000267607.1 207194\_s\_at  
ENSG00000267659.3 217471\_at  
ENSG00000267698.1 212358\_at  
ENSG00000267858.3 "204138\_s\_at,210336\_x\_at,222097\_at,222098\_s\_at"  
ENSG00000267934.1 215344\_at  
ENSG00000268061.3 208751\_at  
ENSG00000268087.1 "216423\_at,221988\_at"  
ENSG00000268650.3 206791\_s\_at

ENSG00000268833.1 "203757\_s\_at,211657\_at"  
ENSG00000268983.1 200076\_s\_at  
ENSG00000269072.1 207224\_s\_at  
ENSG00000269082.1 206557\_at  
ENSG00000269131.1 "212000\_at,212001\_at,64371\_at"  
ENSG00000269145.2 213045\_at  
ENSG00000269176.2 222053\_at  
ENSG00000269292.1 200623\_s\_at  
ENSG00000269352.1 213690\_s\_at  
ENSG00000269427.1 221988\_at  
ENSG00000269609.3 213964\_x\_at  
ENSG00000269621.1 209609\_s\_at  
ENSG00000269653.1 210922\_at  
ENSG00000269707.1 208563\_x\_at  
ENSG00000269749.1 215570\_s\_at  
ENSG00000269793.3 220653\_at  
ENSG00000269926.1 202887\_s\_at  
ENSG00000269956.1 209467\_s\_at  
ENSG00000269967.1 "208615\_s\_at,219540\_at,220176\_at"  
ENSG00000269987.1 "212337\_at,212725\_s\_at"  
ENSG00000270050.1 204793\_at  
ENSG00000270240.2 1405\_i\_at  
ENSG00000270792.3 209097\_s\_at  
ENSG00000270820.3 208775\_at  
ENSG00000271147.5 204793\_at  
ENSG00000271554.1 221855\_at  
ENSG00000271763.1 221880\_s\_at  
ENSG00000271894.1 "204092\_s\_at,221442\_at"  
ENSG00000271955.1 "204554\_at,208399\_s\_at"  
ENSG00000272078.1 220015\_at  
ENSG00000272106.1 213732\_at  
ENSG00000272154.2 "216313\_at,216355\_at,221317\_x\_at,221410\_x\_at"  
ENSG00000272201.1 213615\_at  
ENSG00000272438.1 211992\_at  
ENSG00000272589.1 "214867\_at,216345\_at"  
ENSG00000272758.3 202055\_at  
ENSG00000272770.1 200813\_s\_at  
ENSG00000273032.1 215003\_at  
ENSG00000273071.1 "205776\_at,215300\_s\_at"  
ENSG00000273112.1 117\_at  
ENSG00000273192.1 218444\_at  
ENSG00000273828.1 221528\_s\_at  
ENSG00000274265.2 209700\_x\_at  
ENSG00000274629.1 201370\_s\_at

ENSG00000275585.1 "205660\_at,219022\_at"  
ENSG00000276255.2 221109\_at  
ENSG00000276980.1 221159\_at  
ENSG00000277688.1 213637\_at  
ENSG00000277801.1 218031\_s\_at  
ENSG00000278921.1 220364\_at  
ENSG00000279010.1 209843\_s\_at  
ENSG00000279027.1 220569\_at  
ENSG00000279033.1 218152\_at  
ENSG00000279038.1 "216847\_at,216848\_at"  
ENSG00000279117.1 221861\_at  
ENSG00000279154.1 216732\_at  
ENSG00000279159.1 202197\_at  
ENSG00000279160.1 205975\_s\_at  
ENSG00000279166.1 215713\_at  
ENSG00000279324.1 220871\_at  
ENSG00000279328.1 220824\_at  
ENSG00000279338.1 "201147\_s\_at,201150\_s\_at"  
ENSG00000279364.1 220608\_s\_at  
ENSG00000279428.1 203268\_s\_at  
ENSG00000279516.1 211455\_at  
ENSG00000279636.1 220701\_at  
ENSG00000279689.1 202361\_at  
ENSG00000279726.1 "210572\_at,211365\_s\_at,211870\_s\_at"  
ENSG00000279821.1 215534\_at  
ENSG00000279861.1 208751\_at  
ENSG00000279863.1 220670\_at  
ENSG00000279977.1 216423\_at  
ENSG00000279978.1 206839\_at  
ENSG00000279980.1 "211457\_at,211458\_s\_at"  
ENSG00000280023.1 207779\_at  
ENSG00000280029.1  
    "208504\_x\_at,216313\_at,216355\_at,221317\_x\_at,221408\_x\_at,221450\_x\_at"  
ENSG00000280061.1 206403\_at  
ENSG00000280069.1 222214\_at  
ENSG00000280120.1 215731\_s\_at  
ENSG00000280143.1 203118\_at  
ENSG00000280211.1 "206845\_s\_at,217642\_at"  
ENSG00000280397.1 210703\_at  
ENSG00000280416.1 209667\_at
